# Supplementary material for: Development of a Novel Anti-EpCAM Monoclonal Antibody for Various Applications
Source: MDPI journal article supplement (doi:10.3390/antib11020041), 2022-06-08
Supplement: s1 [file s1]

Supplemental materials

**A**

|               |                         |
|---------------|-------------------------|
| EpCAM_24_43   | QEESVSENYKLAVNSFVNNN    |
| EpCAM_34_53   | LAVNSFVNNNRQSQSTSVGA    |
| EpCAM_44_63   | RQSQSTSVGAQNTVISSKLA    |
| EpCAM_54_73   | QNTVISSKLAASKSLVKAEM    |
| EpCAM_64_83   | AKSLVMKAEMNGSKLGRRAK    |
| EpCAM_74_93   | NGSKLGRRAKPEGALQNNDG    |
| EpCAM_84_103  | PEGALQNNDGLYDPDSDESG    |
| EpCAM_94_113  | LYDPDSDESGLFKAKQSNGT    |
| EpCAM_104_123 | LFKAKQSNGTSTWSVNTAG     |
| EpCAM_114_133 | STWSVNTAGVRRTDKDEI      |
| EpCAM_124_143 | VRRTDKDEITSSSERVRTYW    |
| EpCAM_134_153 | TSSSERVRTYWI I IELKHKAR |
| EpCAM_144_163 | II IELKHKAREKPYDSKSLR   |
| EpCAM_154_173 | EKPYDSKSLRTALQKEITTR    |
| EpCAM_164_183 | TALQKEITTRYQLDPKFITS    |
| EpCAM_174_193 | YQLDPKFITSILYENNVITI    |
| EpCAM_184_203 | ILYENNVITIDLQVNSSQKT    |
| EpCAM_194_213 | DLQVNSSQKTQNDVDIADVA    |
| EpCAM_204_223 | QNDVDIADVAYYFEKDVKG     |
| EpCAM_214_233 | YYFEKDVKGESLFHSSKMDL    |
| EpCAM_224_243 | SLFHSSKMDLTVNGEQLDLD    |
| EpCAM_234_253 | TVNGEQLDLDPGQTLIYYVD    |
| EpCAM_244_262 | PGQTLIYYVDEKAPEFSMQ-    |

**B**

|   | 1      | 2      | 3      | 4       | 5       | 6       | 7       | 8       | 9       |
|---|--------|--------|--------|---------|---------|---------|---------|---------|---------|
| A | 24-43  | 24-43  | 24-43  | 104-123 | 104-123 | 104-123 | 184-203 | 184-203 | 184-203 |
| B | 34-53  | 34-53  | 34-53  | 114-133 | 114-133 | 114-133 | 194-213 | 194-213 | 194-213 |
| C | 44-63  | 44-63  | 44-63  | 124-143 | 124-143 | 124-143 | 204-223 | 204-223 | 204-223 |
| D | 54-73  | 54-73  | 54-73  | 134-153 | 134-153 | 134-153 | 214-233 | 214-233 | 214-233 |
| E | 64-83  | 64-83  | 64-83  | 144-163 | 144-163 | 144-163 | 224-243 | 224-243 | 224-243 |
| F | 74-93  | 74-93  | 74-93  | 154-173 | 154-173 | 154-173 | 234-253 | 234-253 | 234-253 |
| G | 84-103 | 84-103 | 84-103 | 164-183 | 164-183 | 164-183 | 244-262 | 244-262 | 244-262 |
| H | 94-113 | 94-113 | 94-113 | 174-193 | 174-193 | 174-193 | P.C.    | P.C.    | P.C.    |

positive control

**C**

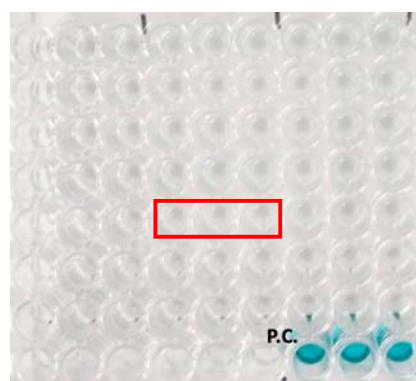

positive control

**Figure S1.** Determination of the recEpMab-37 epitope for EpCAM by ELISA using synthesized peptides of EpCAM extracellular domain. (A) Synthesized peptides of EpCAM extracellular domain. (B, C) The peptides (10 µg/mL) were immobilized on immunoplates as indicated. The plates were incubated with recEpMab-37 (1 µg/mL), followed by incubation with peroxidase-conjugated anti-mouse immunoglobulins. Enzymatic reactions were performed using the ELISA POD Substrate. Optical density was measured at 655 nm. Recombinant EpCAM ectodomain was used as a positive control. The Red square indicates the candidate region of recEpMab-37 epitope determined by flow cytometry (Fig. 4 in the main text). ELISA, enzyme-linked immunosorbent assay .
